# Supplementary material
Source: PubMed Central journal article supplement (PMC4516574)
Supplement: NIHMS686074-supplement-2.pdf [file NIHMS686074-supplement-2.pdf]

**Supplementary Table 2. Effect of virus infection on the p53 pathway**

| Symbol                         | Entrez Gene # | Fold Induction (virus compared to mock) |           |            | Fold Induction (virus compared to virus) |                             |                         |
|--------------------------------|---------------|-----------------------------------------|-----------|------------|------------------------------------------|-----------------------------|-------------------------|
|                                |               | VSV-p53-CC/fs                           | VSV-p53wt | VSV-p53-CC | VSV-p53wt to VSV-p53-CC/fs               | VSV-p53-CC to VSV-p53-CC/fs | VSV-p53-CC to VSV-p53wt |
| <b>Proapoptotic genes</b>      |               |                                         |           |            |                                          |                             |                         |
| ADCK3 (CABC1)                  | 56997         | -                                       | 3.85      | 2.28       | 3.61                                     | 2.14                        | -2.50                   |
| APAF1                          | 317           | -3.42                                   | 3.08      | 2.09       | 10.54                                    | 6.17                        | -                       |
| BAX                            | 581           | -                                       | 2.46      | -          | 4.11                                     | 3.24                        | -                       |
| CASP6                          | 839           | -4.96                                   | 2.04      | -          | 6.00                                     | 2.30                        | -2.14                   |
| EP300 (p300)                   | 2033          | -                                       | -3.63     | -4.43      | -2.94                                    | -3.72                       | -                       |
| FAS                            | 355           | 6.40                                    | 3.72      | -          | -                                        | -3.74                       | -2.01                   |
| JMY                            | 133746        | -                                       | -         | -2.08      | -                                        | -2.84                       | -                       |
| LRDD (PIDD1)                   | 55367         | 3.08                                    | 5.05      | 5.22       | 2.49                                     | 2.19                        | -                       |
| MED1 (TRAP220)                 | 5469          | -                                       | -3.35     | -3.59      | -2.53                                    | -                           | -                       |
| NOXA (PMAIP1)                  | 5366          | 25.42                                   | 17.52     | 16.68      | -                                        | -                           | -                       |
| PIG3 (TP53I3)                  | 9540          | -2.06                                   | 17.61     | 10.82      | 36.32                                    | 22.32                       | -                       |
| PLAGL1 (ZAC1)                  | 5325          | -                                       | 2.17      | -          | 2.47                                     | -                           | -                       |
| PPP1R151B                      | 84919         | -                                       | -3.24     | -3.88      | -4.02                                    | -4.81                       | -                       |
| PUMA (BBC3)                    | 27113         | 3.43                                    | 2.04      | -          | -                                        | -                           | -                       |
| TEAP (TP53INP1)                | 94241         | -                                       | 33.44     | 18.51      | 49.87                                    | 27.61                       | -                       |
| TNFRSF10A (DR4)                | 8797          | -                                       | 2.55      | -          | 5.07                                     | 2.13                        | -2.38                   |
| TNFRSF10B (DR4)                | 8795          | 5.09                                    | -         | -          | -2.31                                    | -3.85                       | -                       |
| <b>Antiapoptotic genes</b>     |               |                                         |           |            |                                          |                             |                         |
| BCL2                           | 596           | -                                       | -         | 2.61       | -                                        | 3.30                        | 2.05                    |
| HDAC9                          | 9734          | 8.93                                    | -         | -          | -12.51                                   | -14.43                      | -                       |
| SLUG (SNAI1)                   | 6591          | -                                       | 13.81     | 6.63       | 24.61                                    | 11.82                       | -2.08                   |
| TIGAR (C12orf5)                | 57103         | -2.75                                   | 3.34      | 2.44       | 9.20                                     | 6.71                        | -                       |
| TRIM29                         | 23650         | -                                       | 2.76      | 2.95       | 2.55                                     | 2.73                        | -                       |
| <b>Cell Proliferation</b>      |               |                                         |           |            |                                          |                             |                         |
| CCND1 (Cyclin D)               | 595           | -2.65                                   | -2.22     | -2.69      | -                                        | -                           | -                       |
| CDK2                           | 1017          | -2.21                                   | -         | -2.49      | 2.25                                     | -                           | -                       |
| CTNNB1 (B-CATENIN)             | 1499          | -3.11                                   | -3.75     | -2.87      | -                                        | 2.26                        | -                       |
| JUN (C-JUN)                    | 3725          | 8.08                                    | -2.96     | -2.46      | -6.32                                    | -4.71                       | -                       |
| KAT2b (PCAF)                   | 8850          | -                                       | 3.71      | 3.17       | 6.38                                     | 5.44                        | -                       |
| MDM2                           | 4193          | 2.03                                    | 6.22      | 5.27       | 3.07                                     | 2.67                        | -                       |
| MDM4                           | 4194          | -                                       | -3.89     | -2.58      | -2.22                                    | -2.04                       | -                       |
| PIAS1                          | 8554          | -                                       | -3.46     | -3.38      | -2.78                                    | -2.79                       | -                       |
| PIK3CA (PI3K)                  | 5290          | -                                       | -         | -2.17      | -                                        | -2.48                       | -                       |
| <b>Cell Cycle Arrest</b>       |               |                                         |           |            |                                          |                             |                         |
| CDKN1A (p21)                   | 1026          | 2.75                                    | 7.15      | 6.41       | 2.60                                     | 2.33                        | -                       |
| CHEK1 (CHK1)                   | 1111          | -                                       | -3.50     | -3.03      | -                                        | -2.05                       | -                       |
| CHEK2 (CHK2)                   | 11200         | 7.36                                    | -         | -          | -5.47                                    | -9.31                       | -                       |
| GADD45                         | 1647          | -                                       | 3.22      | 3.47       | 3.82                                     | 4.12                        | -                       |
| HIPK2                          | 28996         | -                                       | -2.25     | -2.17      | -2.06                                    | -                           | -                       |
| PML                            | 5371          | 4.34                                    | 2.25      | 2.09       | -2.69                                    | -2.10                       | -                       |
| PTEN                           | 5728          | 2.01                                    | 3.62      | 3.69       | 2.46                                     | 2.34                        | -                       |
| SERPINE1 (PAI-1)               | 5054          | 2.48                                    | 5.76      | 20.69      | 2.33                                     | 8.36                        | 4.11                    |
| SFN (14-3-3 SIGMA)             | 2810          | -3.84                                   | 4.73      | 3.57       | 15.80                                    | 11.75                       | -                       |
| <b>Angiogenesis Inhibition</b> |               |                                         |           |            |                                          |                             |                         |
| THBS1                          | 7057          | -                                       | -         | 2.51       | -                                        | 2.64                        | 2.52                    |
| <b>Induction of Autophagy</b>  |               |                                         |           |            |                                          |                             |                         |
| DRAM1                          | 55332         | 2.07                                    | 4.36      | 4.08       | 2.11                                     | -                           | -                       |
| <b>DNA repair</b>              |               |                                         |           |            |                                          |                             |                         |
| PCNA                           | 5111          | -3.28                                   | -         | -          | 2.80                                     | 2.81                        | -                       |
| RRM2B (P53R2)                  | 50484         | -                                       | 2.23      | 2.09       | 2.48                                     | 2.32                        | -                       |
| TOPBP1                         | 11073         | -                                       | -3.61     | -3.42      | -2.91                                    | -2.75                       | -                       |

Ingenuity pathway analysis of Interferon Signaling in Suit2 cells.

Cellular transcripts were reported if they were more than 2-fold up or downregulated 8 h p.i.

Cellular transcript profiles after infection of each virus, VSV-p53-CC/fs, VSV-p53wt, or VSV-p53-CC, are compared to mock as well to each other.
